# Supplementary material for: Therapeutic Treatment of Arthritic Mice with 15-Deoxy Δ12,14-Prostaglandin J2(15d-PGJ2) Ameliorates Disease through the Suppression of Th17 Cells and the Induction of CD4+CD25−FOXP3+Cells
Source: Hindawi journal article supplement (doi:10.1155/2016/9626427), 2016-01-01
Supplement: f1 [file 9626427.f1.pdf]

658

659

## Supplementary Table 1

660

661 *Supplementary Table 1. Raw scores from arthritic mice*

| Days of treatment | Pain           |                | Edema          |                | Affected paws |               | Clinical score |               |
|-------------------|----------------|----------------|----------------|----------------|---------------|---------------|----------------|---------------|
|                   | Vehicle        | PGJ2           | Vehicle        | PGJ2           | Vehicle       | PGJ2          | Vehicle        | PGJ2          |
| 1                 | 4.16 ±<br>0.31 | 3.90 ±<br>0.65 | 1.97 ±<br>0.10 | 1.93 ±<br>0.02 | 1.2 ±<br>0.44 | 1.2 ±<br>0.44 | 1.2 ±<br>0.44  | 1.0 ±<br>1.34 |
| 2                 | 4.42 ±<br>0.49 | 3.17 ±<br>0.64 | 2.21 ±<br>0.05 | 2.07 ±<br>0.12 | 2.4 ±<br>0.54 | 2.2 ±<br>0.83 | 5.8 ±<br>0.83  | 3.0 ±<br>1.22 |
| 3                 | 5.12 ±<br>0.95 | 3.38 ±<br>0.66 | 2.26 ±<br>0.09 | 1.99 ±<br>0.09 | 2.4 ±<br>0.54 | 2.0 ±<br>0.70 | 6.0 ±<br>0.70  | 3.2 ±<br>0.83 |
| 4                 | 5.55 ±<br>0.42 | 3.61 ±<br>0.61 | 2.27 ±<br>0.10 | 1.99 ±<br>0.12 | 2.4 ±<br>0.54 | 2.6 ±<br>0.54 | 6.0 ±<br>1.00  | 3.8 ±<br>0.83 |
| 5                 | 6.20 ±<br>0.46 | 3.87 ±<br>0.99 | 2.35 ±<br>0.07 | 1.94 ±<br>0.12 | 2.4 ±<br>0.54 | 2.4 ±<br>0.54 | 6.0 ±<br>0.70  | 3.8 ±<br>0.83 |
| 6                 | 6.06 ±<br>0.64 | 4.09 ±<br>0.90 | 2.33 ±<br>0.16 | 2.02 ±<br>0.11 | 2.4 ±<br>0.54 | 2.2 ±<br>0.44 | 6.2 ±<br>0.83  | 4.2 ±<br>0.83 |
| 7                 | 6.22 ±<br>0.59 | 4.06 ±<br>0.59 | 2.29 ±<br>0.18 | 2.04 ±<br>0.11 | 2.6 ±<br>0.54 | 2.4 ±<br>1.14 | 6.6 ±<br>1.14  | 4.0 ±<br>1.00 |
| 8                 | 6.13 ±<br>0.64 | 3.79 ±<br>0.70 | 2.38 ±<br>0.17 | 2.11 ±<br>0.17 | 2.4 ±<br>0.54 | 2.4 ±<br>0.89 | 6.6 ±<br>1.34  | 4.2 ±<br>1.30 |

662 *Table Legend:* Arthritic mice were treated by the subcutaneous route with vehicle or 15d-PGJ<sub>2</sub> (1 mg/Kg) for 7 d  
663 and the mice were monitored for disease progression as indicated by clinical scores, number of affected paws,  
664 hypernociception and edema Data are expressed as the mean ± SEM.

665

666

667

668

669

670

671

672

Supplementary Figure 1

673

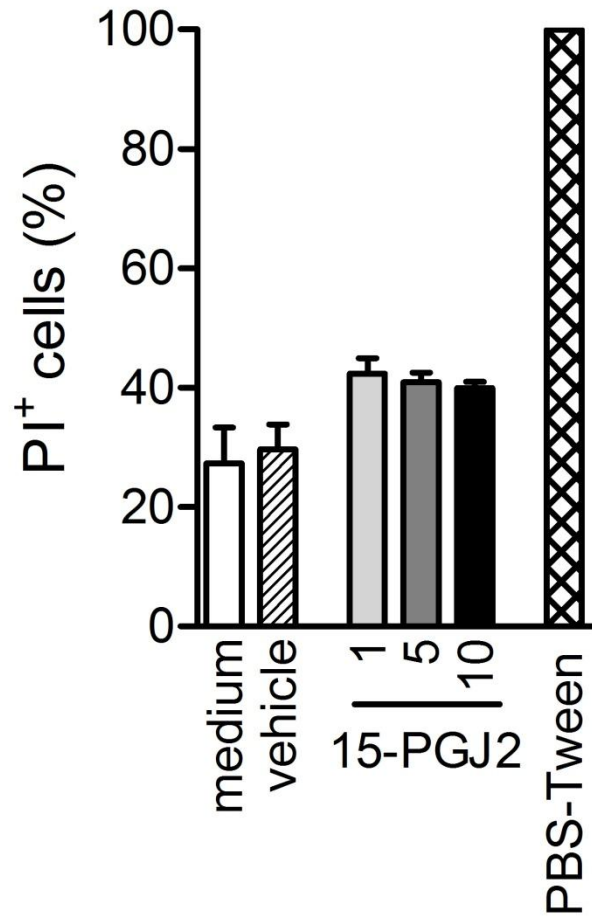

674
